# Supplementary material for: Genome-wide analysis of WOX genes in upland cotton and their expression pattern under different stresses
Source: PubMed Central journal article supplement (PMC5501002; doi:10.1186/s12870-017-1065-8), 2017-07-06
Supplement: 12870_2017_1065_MOESM11_ESM.pdf [file 12870_2017_1065_MOESM11_ESM.pdf]

EXON 1

Gh\_A11G2876 1 ATGGAGTGGGAGAATCAACATGGAGAAGAAGAGTACTTGCAGTACCAAATTCAGAATGGG  
 Gh\_WOX10\_Dt 1 ATGGAGCGGGAGAATCAACATGGAGAAGAAGAGTATTGCAGTACCAAATTCAGAATGGG

EXON 1

Gh\_A11G2876 61 GTTTGC GGGAAGTGATGAGTGATGAACAGGTAGAGGAACTGAAGAAACAGATCGTTGCC  
 Gh\_WOX10\_Dt 61 GTTTGC GGGAAGTGATGAGTGATGAACAGGTAGAGGAACTGAAGAAACAGATCGTTGCC

EXON 1

Gh\_A11G2876 121 TATTC CGCTATTTCTGAACAGCTTGCTGAGTTGCACAAATCCATGTCTGCCCCACAGAT  
 Gh\_WOX10\_Dt 121 TATTCAGCCATTTCTGAACAGCTTGCCGAGTTGCACAAATCCATGTCTGCCGCCACAGAT

Gh\_A11G2876 181 TTTACTGGTTCTCTTCTCTTTTGTTCCTTTTGTTCCTTTTCGACATGTTCCCCAGTTGAGT  
 Gh\_WOX10\_Dt 181 TTTACTGGTTCTCTTCTCTCTTTCCTTTTGTTCCTTTTTCGACATGTTCCCCAGTTGAGT

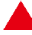

Gh\_A11G2876 241 TCACCATT CGAATTCCTTATTTGATCCGAATCGGCAATTTAGGTTTTACAGAAGCAAAGT  
 Gh\_WOX10\_Dt 241 TCACCATT TGGATTCCTTATTTGATCCAATCGGCAATTTAGGTTTTACAGAAGCAAAGT

Gh\_A11G2876 301 GAAAAAAA AAAGCTTTCATTGAAGGTGTCAGTCTTCTCTTTGAGAAGATGAAGATTTTA  
 Gh\_WOX10\_Dt 301 GAAAAAACA--GCTTTCATTGAAGGCTGTCAGTTTCTCTTTGAGAAGATGAAGATTTTA

Gh\_A11G2876 361 AAGAAAGGCCACGTTTTTTTAGATGTTGGATTTTTAATTTATTCATTTATTTATTTTTAA  
 Gh\_WOX10\_Dt 359 AAGAAAGGCCACGTTTTTTTAGATGTTGGATTTTTAATTTATTCATTTATTTATTTTTAA

Gh\_A11G2876 421 TATAATTTGTTTTTTTTAAGAAGCAAATGTTGCTGGAAATTTTCATTAATTTCTAAAC  
 Gh\_WOX10\_Dt 419 TATAATTTGTTTTTTTT-AAGTAGCAAATGTTGTTGGGAATTTTCATTAATTTCTA----

Gh\_A11G2876 481 CATTGTGTTCAAAAAATAAATATCAAGCAGTTTCTAGAAATAA-TTTTATATAAATATTA  
 Gh\_WOX10\_Dt 474 -----AAAATAAACATCAAGCAGTTTCTAGAACAAAATTTTATATAAATATTA

Gh\_A11G2876 540 TTTATAGTATTTTACAAACATTTTAAAAATATTGTTATGTTGGGTTTTTTAAATATTTT  
 Gh\_WOX10\_Dt 522 TTTATAGTATTTTACAAACATTTTAAAAATATTGTTATGTTGGGTTTTTTAAATATTTT

Gh\_A11G2876 600 ATATGTAGATGGTA TATTTATATTCTTTTAAATTAATTTAAAAATATATATATTGTATTATA  
 Gh\_WOX10\_Dt 582 ATATGTAGATGGTC-----

Gh\_A11G2876 660 TCTAAAAC TGGTCATGGGATTGTTTATCTAAT-TTGAAAAC TCGTTTGAAAAGTGTAAGG  
 Gh\_WOX10\_Dt 596 -----GGATTGTTTATCCAATCTTAAAAATTTGTTTGAAAAGTGCAAGG

Gh\_A11G2876 719 ATTTAGTTAGAAATATAAATCTCAAAAATTAAGATGTATAAAAAAAAGT-CCGTTTTTTA  
 Gh\_WOX10\_Dt 640 GTTTAGTTAAAAATATAGATT-AAAAATGGGTTGATAAAAAATAACTTCCGTTTTTTA

Gh\_A11G2876 778 AATGCGTTGGGTATTAAGTGGT TTTTTTTTGTGTTTGGCTTGGCTTAAATCAGTTGTTTT  
 Gh\_WOX10\_Dt 699 AATGAGTTGGGCCTCAGGTGGTGTTTTTTTG-GTTTCAGCTTGGCTTAAATCAGTTGTTTT

Gh\_A11G2876 838 GTT-----ATCATTTGTTATTATATTATTGTTATTGTTTTGATATTATATAAC  
 Gh\_WOX10\_Dt 758 GTTGTGTTTGGCTATCATTTCGTTATTATATTGTTGTTATTA TTTTGATATTATATAAC

Gh\_A11G2876 887 TCTTGT TTTATTATTAATTTTGT TATTATTTTAGACATTTTGCCTTGATAAGATGCAACT  
 Gh\_WOX10\_Dt 818 TCTTGT TTTATTATTAAC TTTGT TATTATTTTAGACATTTTGCCTTGATAAGATGTAATT

Gh\_A11G2876 947 ATTTTAGTCTTATTCAAATTAATTTAATAAGAATAGGTCGGCATGGATTGAGTTTAGTA  
 Gh\_WOX10\_Dt 878 ATTTTAGTATTATTAAATTAATTTAATAACGAGTGGGTCGAAATGGATTGGGTTTAGTA

Gh\_A11G2876 1007 TTTTTAAT--AGGCTAAGCTTAGATAGAATTTTAGATTCAATTTCTGAGTTGAATCTGAA  
 Gh\_WOX10\_Dt 938 TTTTTAATTTGGGTTGAGCTTAGGTAGAATTTTAGATTATTTTTTTGAGTCTGATCTTAA

Gh\_A11G2876 1065 AT TAAAATCTTG CATCTGACT GACCCATGATAAGAT-----  
Gh\_WOX10\_Dt 998 CTTAAAATCTTGTATC-AACC GACCCATAATCAGATTTAATTCTACTTTATAGAAATAAA

Gh\_A11G2876 1101 -----AAT  
Gh\_WOX10\_Dt 1057 TTGTGAGAATCGTAAAATTGTATTTCTTTTTGTATGACTAGTCTATCATATTGCTTAAT

Gh\_A11G2876 1104 GCTTACCAAATAAATAACAGATTTTTC TTCCGATTGTGTTA CTCGTACTGCATCTCGTCC  
Gh\_WOX10\_Dt 1117 GCTTACCAAATAAATAACAGGTTTTGT TTCCGATTTTGTTCTCGTACTGCATCTGGTCT

Gh\_A11G2876 1164 AAGTACCATAGAGTTAAAAGCTTAGAGAAAATCGTTGTCTGGCTGCCTTAGTCCTATCAT  
Gh\_WOX10\_Dt 1177 AAGTACCATAGAGTTAAAAGCTTAGAGAAAATCGTTGTCTGGCTGCCTTAGTCCTATCAT  
EXON 2

Gh\_A11G2876 1224 CAATTGCTGTTTTGGTTTT CAGGCATAAGGTTGGGAAATCTATACAGTGATCCAATATCAG  
Gh\_WOX10\_Dt 1237 CAATTGCTGTTTTGGTTTT CAGGCATAAGGTTGGGAAATCTATACTGTGATCCAATATCAG  
EXON 2

Gh\_A11G2876 1284 CT TCTGT C GGGCAG AAGATCACTG CTAGACAGCGATGGACTCCAACGCCATTACAACCTC  
Gh\_WOX10\_Dt 1297 CCTCTTTT GGGCAG AAGATCACTC CTAGACAGCGATGGACTCCAACGCCATTACAACCTC  
EXON 2

Gh\_A11G2876 1344 AAATTCTT GAGAATATATATGAGCAAGGAACCGGGACACCAAGCAAGCAGAAAATCAAAG  
Gh\_WOX10\_Dt 1357 AAATTCTA GAGAATATATATGAGCAAGGAACCGGGACACCAAGCAAGCAGAAAATCAAAG  
EXON 2

Gh\_A11G2876 1404 AGATAGCATCTGAACTAGC CAACATGGTTGA-----  
Gh\_WOX10\_Dt 1417 AGATAGCATCTGAACTAGCA CAACATGGTCA AATTTCTGAAACTAATGTATATAATTGGT  
EXON 2

Gh\_A11G2876  
Gh\_WOX10\_Dt 1477 TTCAGAATCGTCGTGCTCGTTCAAAAAGAAAATTT CAGGTCTCTACTGGTTCAGCCAATG  
EXON 2

Gh\_A11G2876  
Gh\_WOX10\_Dt 1537 CTGAACCTGAACCAGATGTGAGCACAAAAGAGAAAAGACCAACCCAGTAGGTCTGGACT  
EXON 2

Gh\_A11G2876  
Gh\_WOX10\_Dt 1597 -----  
TCATTGACAGCTTCTCACAAGGGGTTGAAAGCTTCTATTTCCAAGGTTCTGAATCAGGTA  
EXON 2

Gh\_A11G2876  
Gh\_WOX10\_Dt 1657 -----  
CTAAAATGTAGCATTGGTCTTGTGTCGAAATCATAACTTTCTTTTTTTTAAAAGTTC  
EXON 3

Gh\_A11G2876  
Gh\_WOX10\_Dt 1717 -----  
TTTTTGCAGGGATTGATCAGTTGATGGGTAAAGAGGAATCTTCACGAGGCTATGATCCTT  
EXON 3

Gh\_A11G2876  
Gh\_WOX10\_Dt 1777 -----  
ACAATAATTTAGTTGAACAATTTGGGTTATTAGGATGA
