# Supplementary material for: Genome-wide analysis of WOX genes in upland cotton and their expression pattern under different stresses
Source: PubMed Central journal article supplement (PMC5501002; doi:10.1186/s12870-017-1065-8), 2017-07-06

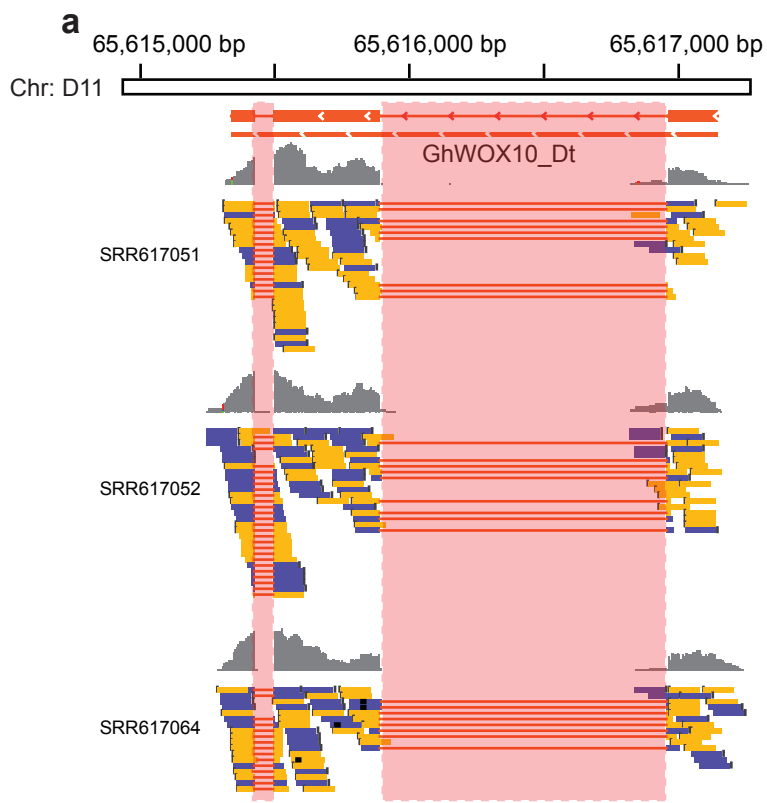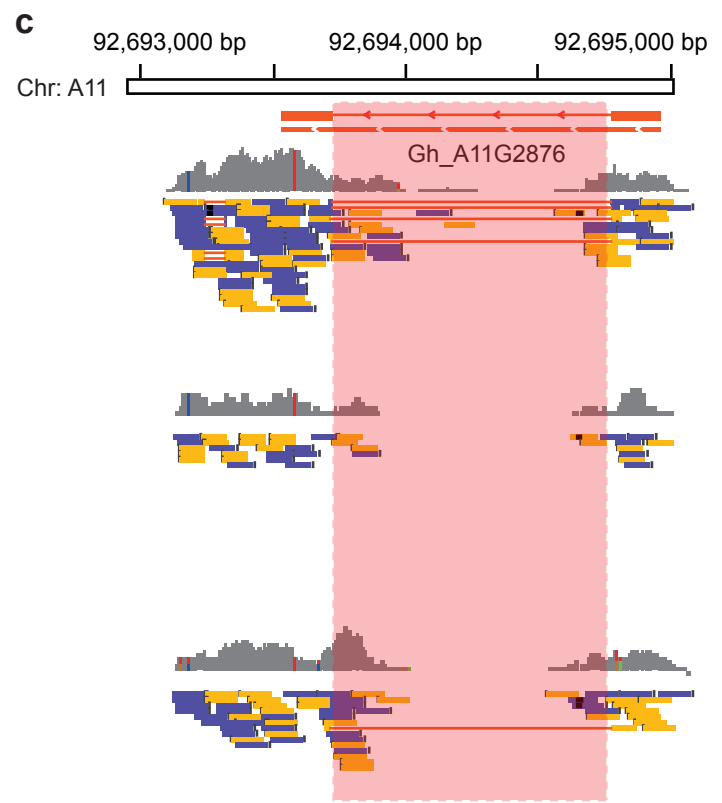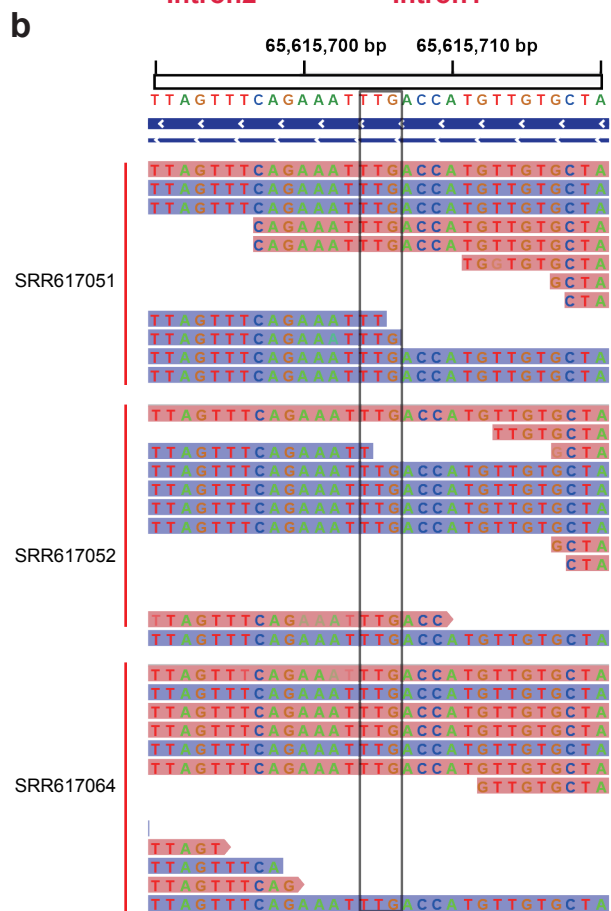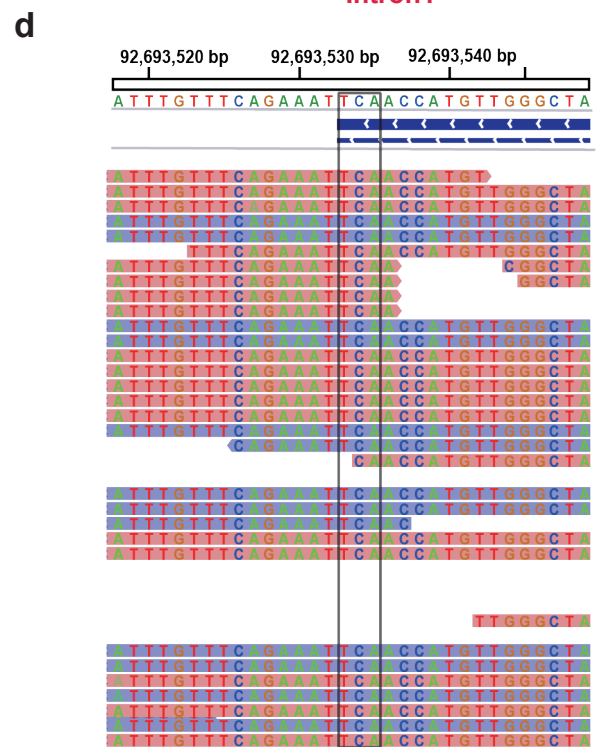

Supplement: 12870_2017_1065_MOESM12_ESM.pdf [file 12870_2017_1065_MOESM12_ESM.pdf]
